# Supplementary material for: Mechanisms That Generate Resource Pulses in a Fluctuating Wetland
Source: PubMed Central journal article supplement (PMC4957811; doi:10.1371/journal.pone.0158864), 2016-07-22

S1 Appendix. A schematic of the sampling components within a primary sampling unit.

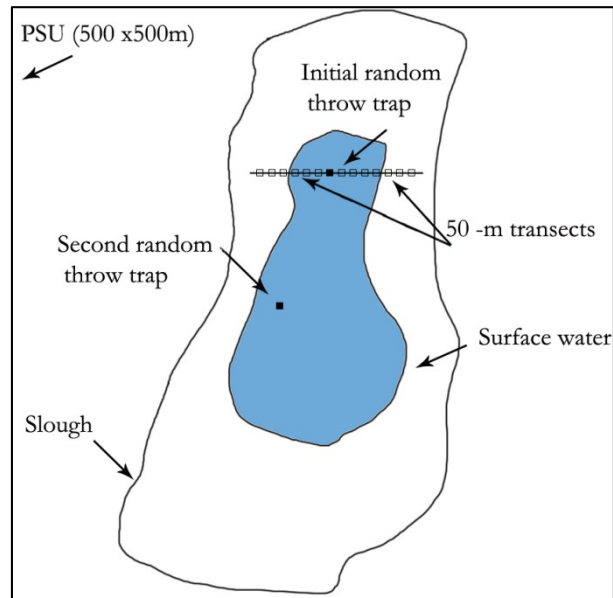

Supplement: pone.0158864.s001.pdf [file pone.0158864.s001.pdf]
