# Supplementary material for: Mechanisms That Generate Resource Pulses in a Fluctuating Wetland
Source: PubMed Central journal article supplement (PMC4957811; doi:10.1371/journal.pone.0158864), 2016-07-22
Supplement: pone.0158864.s002.pdf [file pone.0158864.s002.pdf]

S2 Appendix. Akaike's Information Criterion model selection for factors affecting fish,  
crayfish and grass shrimp biomass in the Florida Everglades, USA.

| Model                                     | -2 LogLike | Parms | AICc    | ΔAIC   | w <sub>i</sub> | R <sup>2</sup> |
|-------------------------------------------|------------|-------|---------|--------|----------------|----------------|
| Fish Models                               |            |       |         |        |                |                |
| FISHBIOWET MCRIND REC SUBMGVEG            | 1085.84    | 24    | 1137.17 | 0.00   | 0.75           | 0.3171         |
| FISHBIOWET*REC                            |            |       |         |        |                |                |
| FISHBIOWET MCRIND REC SUBMGVEG            | 1090.94    | 23    | 1140.00 | 2.83   | 0.18           | 0.3073         |
| GLOBAL                                    | 1083.73    | 27    | 1141.96 | 4.79   | 0.07           | 0.3211         |
| FISHBIOWET REC MCRIND FISHBIOWET*REC      | 1108.57    | 23    | 1157.61 | 20.44  | 0.00           | 0.2723         |
| FISHBIOWET REC MCRIND                     | 1113.99    | 22    | 1160.76 | 23.59  | 0.00           | 0.2613         |
| FISHBIOWET SUBMGVEG                       | 1139.90    | 21    | 1184.50 | 47.29  | 0.00           | 0.2064         |
| DSD REC MCRIND SUBMGVEG DSD*REC           | 1139.31    | 24    | 1190.49 | 53.32  | 0.00           | 0.2077         |
| FLOC REC MCRIND SUBMGVEG                  | 1143.11    | 23    | 1192.03 | 54.86  | 0.00           | 0.1994         |
| DSD REC MCRIND SUBMGVEG                   | 1143.13    | 23    | 1192.05 | 54.88  | 0.00           | 0.1994         |
| FLOC REC MCRIND                           | 1155.61    | 22    | 1202.28 | 65.11  | 0.00           | 0.1713         |
| DSD REC MCRIND DSD*REC                    | 1161.02    | 23    | 1209.92 | 72.75  | 0.00           | 0.1588         |
| FISHBIOWET                                | 1170.10    | 20    | 1212.30 | 75.18  | 0.00           | 0.1375         |
| DSD REC MCRIND                            | 1167.02    | 22    | 1213.67 | 76.50  | 0.00           | 0.1448         |
| NULL                                      | 1224.11    | 19    | 1264.08 | 126.91 | 0.00           | 0.0000         |
| Crayfish Models                           |            |       |         |        |                |                |
| GLOBAL                                    | 972.52     | 27    | 1030.76 | 0.00   | 1.00           | 0.3824         |
| FISHBIODRY DEPTH CRAYBIOWET SUBMGVEG      | 1023.27    | 23    | 1072.33 | 41.57  | 0.00           | 0.2878         |
| FISHBIODRY REC DEPTH DSD FLOC             | 1050.74    | 24    | 1101.93 | 71.17  | 0.00           | 0.2311         |
| CRAYBIOWET SUBMGVEG                       | 1062.03    | 21    | 1106.58 | 75.82  | 0.00           | 0.2066         |
| FISHBIODRY REC DEPTH FLOC                 | 1067.11    | 23    | 1116.03 | 85.27  | 0.00           | 0.1954         |
| CRAYBIOWET REC MCRIND                     | 1080.25    | 22    | 1127.02 | 96.26  | 0.00           | 0.1656         |
| FISHBIODRY REC DEPTH DSD                  | 1085.92    | 23    | 1134.84 | 104.08 | 0.00           | 0.1524         |
| FISHBIODRY REC DEPTH                      | 1102.90    | 22    | 1149.57 | 118.81 | 0.00           | 0.1118         |
| FISHBIODRY REC DSD                        | 1116.88    | 22    | 1163.53 | 132.77 | 0.00           | 0.0769         |
| NULL                                      | 1146.08    | 19    | 1186.05 | 155.29 | 0.00           | 0.0000         |
| Shrimp Models                             |            |       |         |        |                |                |
| GLOBAL                                    | 804.54     | 25    | 858.17  | 0.00   | 0.71           | 0.2758         |
| CRAYBIODRY GRSHBIOWET REC MCRIND SUBMGVEG | 810.86     | 23    | 859.92  | 1.75   | 0.29           | 0.2621         |
| GRSHBIOWET MCRIND REC SUBMGVEG            | 834.27     | 22    | 881.07  | 22.90  | 0.00           | 0.2094         |
| GRSHBIOWET REC MCRIND                     | 839.55     | 21    | 884.07  | 25.90  | 0.00           | 0.1971         |
| CRAYBIODRY DSD REC MCRIND SUBMGVEG        | 838.45     | 23    | 887.37  | 29.20  | 0.00           | 0.1997         |
| CRAYBIODRY FLOC REC MCRIND SUBMGVEG       | 842.64     | 23    | 891.56  | 33.39  | 0.00           | 0.1898         |
| CRAYBIODRY DSD SUBMGVEG                   | 857.99     | 21    | 902.42  | 44.25  | 0.00           | 0.1527         |
| CRAYBIODRY DSD SUBMGVEG FLOC              | 857.02     | 22    | 903.69  | 45.53  | 0.00           | 0.1551         |
| CRAYBIODRY DSD                            | 863.61     | 20    | 905.80  | 47.63  | 0.00           | 0.1387         |
| REC MCRIND SUBMGVEG FLOC                  | 866.10     | 22    | 912.77  | 54.61  | 0.00           | 0.1324         |
| CRAYBIODRY SUBMGVEG                       | 872.46     | 20    | 914.67  | 56.50  | 0.00           | 0.1163         |
| NULL                                      | 915.39     | 18    | 953.16  | 95.00  | 0.00           | 0.0000         |
